# Supplementary material for: Plasma membrane H+ pump at a crossroads of acidic and iron stresses in yeast-to-hypha transition
Source: Royal Society of Chemistry journal article supplement (doi:10.1039/d0mt00179a), 2020-11-23
Supplement: d0mt00179a1.pdf [file d0mt00179a1.pdf]

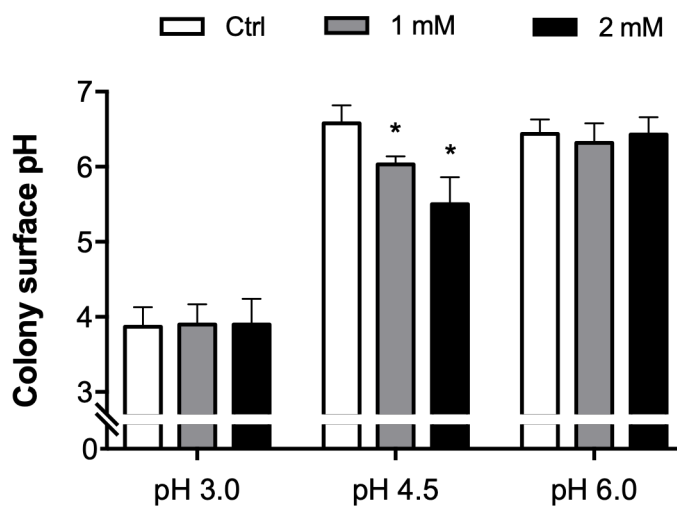

**Supplementary Figure S1.** Effect of acidic growth pH and iron on extracellular microenvironment pH. The pH was determined at cell surface by scanning ion selective electrode technique after 72 h of growth on YED plates at indicated pH, in the absence (Ctrl) or presence of 1 mM and 2 mM FeSO<sub>4</sub> at 30°C. Values are mean ± s.d. (n=3). Asterisk indicates statistically significant differences between control and iron-grown cells (\* $P \leq 0.05$ ).
