# Supplementary material for: Plasma membrane H+ pump at a crossroads of acidic and iron stresses in yeast-to-hypha transition
Source: Royal Society of Chemistry journal article supplement (doi:10.1039/d0mt00179a), 2020-11-23
Supplement: d0mt00179a2.pdf [file d0mt00179a2.pdf]

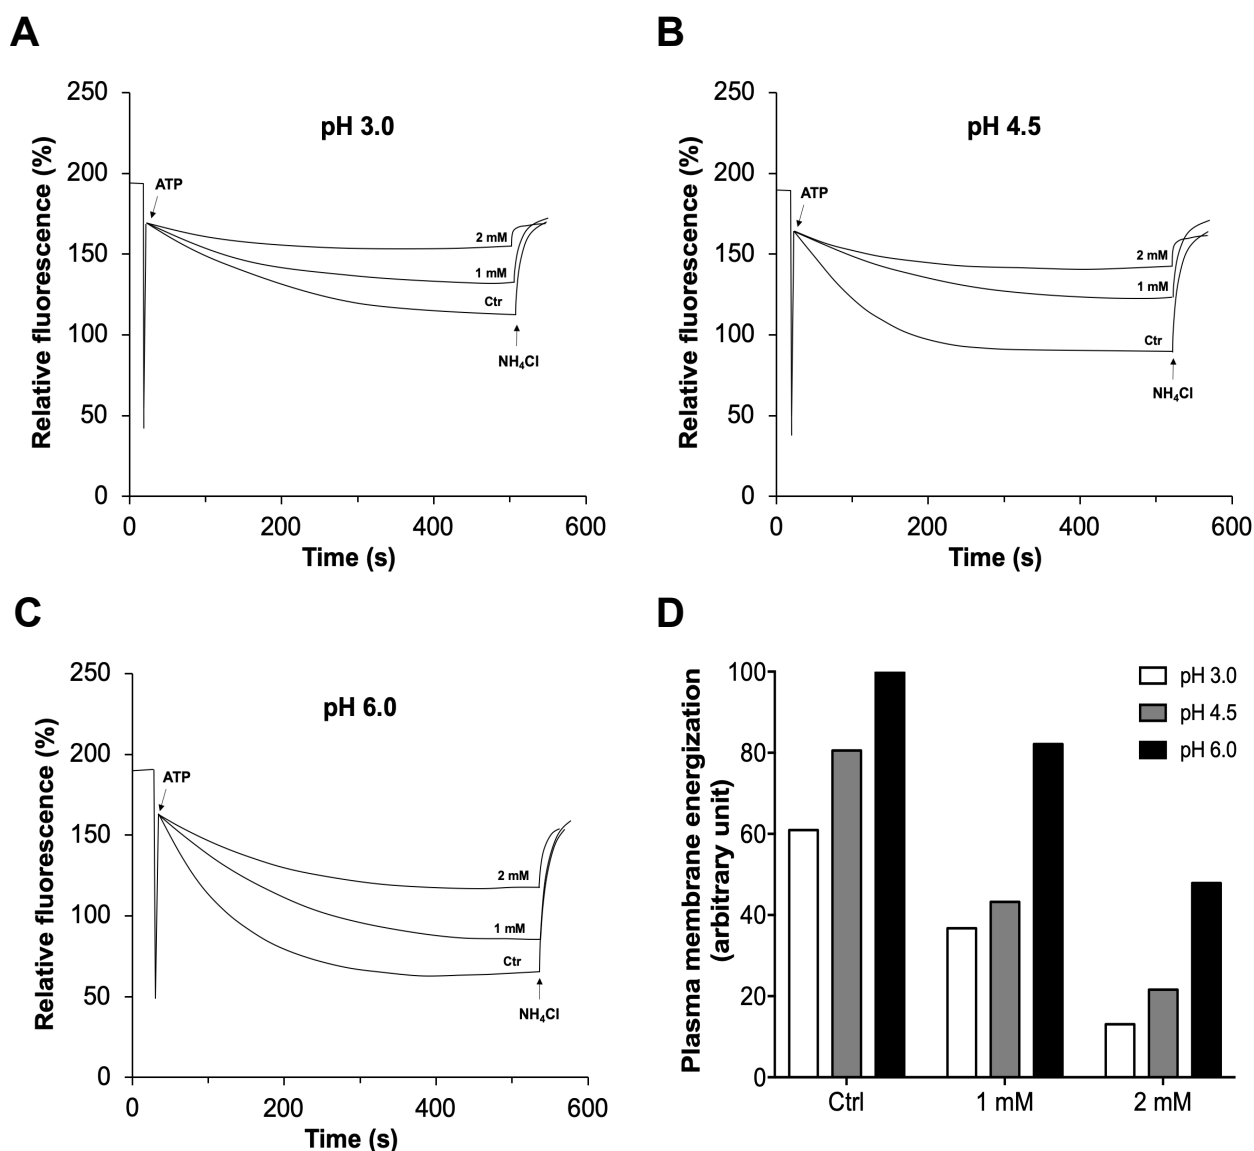

**Supplementary Figure S2.** ATP-dependent energization of *Y. lipolytica* membranes. The quenching of ACMA fluorescence upon the addition of 1 mM ATP (indicated by an arrow) in total membrane vesicles isolated from cells grown in the absence (Ctrl, A) or presence of 1 mM (B) and 2 mM  $\text{FeSO}_4$  (C) at pH 3.0, 4.5 and 6.0 for 20 h is shown. In all cases, 20 mM  $\text{NH}_4\text{Cl}$  was added to dissipate the  $\text{H}^+$  gradient. (D) Effect of iron on membrane energization at different growth pH. Representative fluorescence traces are shown.
