# Supplementary material for: Plasma membrane H+ pump at a crossroads of acidic and iron stresses in yeast-to-hypha transition
Source: Royal Society of Chemistry journal article supplement (doi:10.1039/d0mt00179a), 2020-11-23
Supplement: d0mt00179a3.pdf [file d0mt00179a3.pdf]

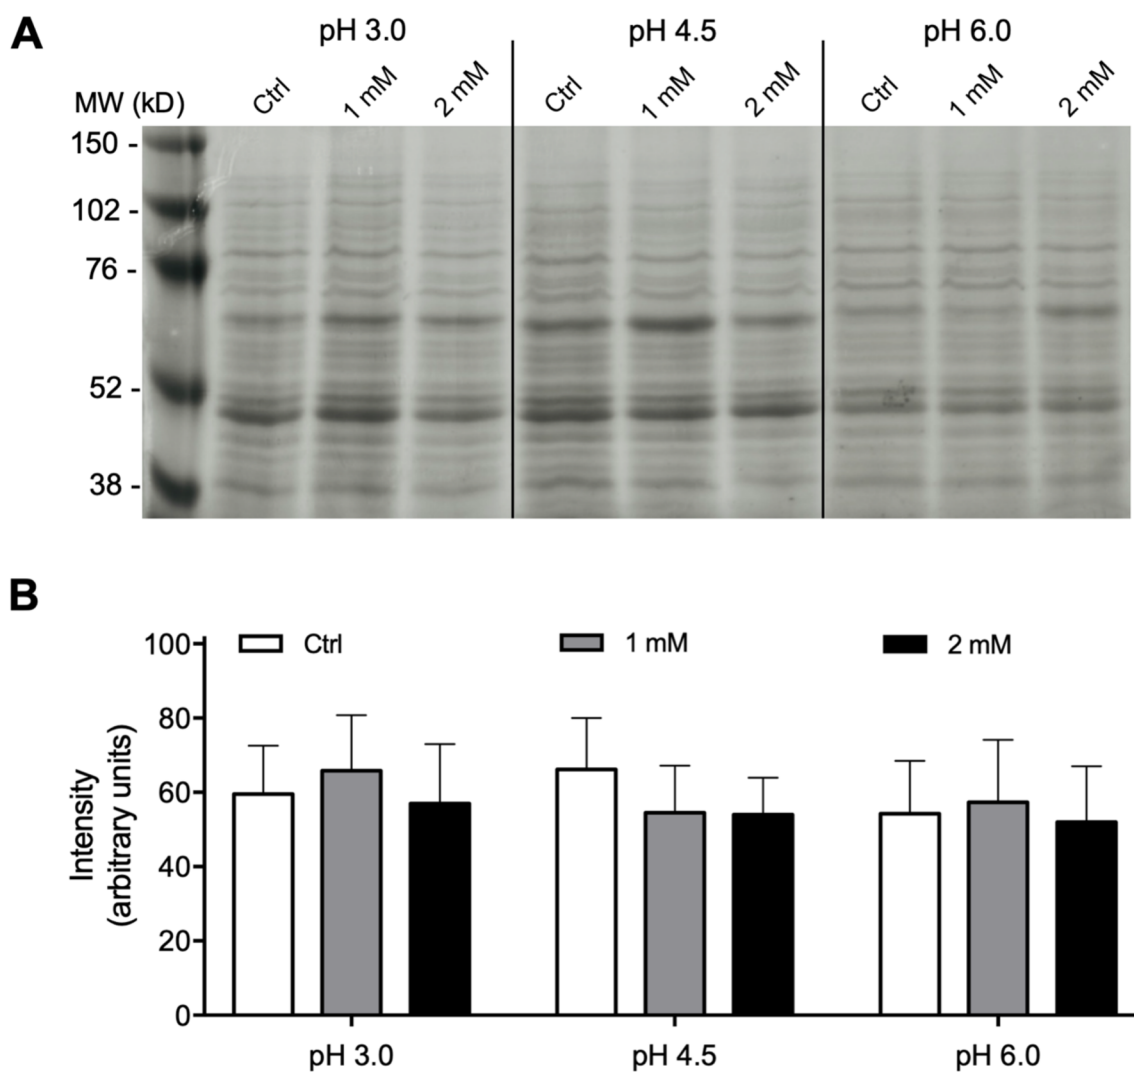

**Supplementary Figure S3.** (A) Coomassie-stained 10% SDS-PAGE of total membranes vesicles (10  $\mu$ g) isolated from *Y. lipolytica* cells grown at YED medium with pH adjusted to 3.0, 4.5 and 6.0 in the absence (Ctrl) or presence of 1 mM and 2 mM  $\text{FeSO}_4$  for 20 h. (B) The intensities of protein bands were quantified using ImageJ densitometric software. Values are mean  $\pm$  s.d. (n=3).
