# Supplementary material for: Plasma membrane H+ pump at a crossroads of acidic and iron stresses in yeast-to-hypha transition
Source: Royal Society of Chemistry journal article supplement (doi:10.1039/d0mt00179a), 2020-11-23
Supplement: d0mt00179a4.pdf [file d0mt00179a4.pdf]

**Supplementary Table S1.** *Saccharomyces cerevisiae* proteins used for STRING analysis and homologous proteins encoded in *Yarrowia lipolytica*.

| <i>S. cerevisiae</i> protein | Function                           | Localization                   | <i>Y. lipolytica</i> homolog |
|------------------------------|------------------------------------|--------------------------------|------------------------------|
| Pma1p                        | proton pump                        | plasma membrane                | YPma1p / YALI22066g          |
| Fet3p                        | iron transport multicopper oxidase | plasma membrane                | YIFet3p / YALI0D07282g       |
| Fre1p                        | ferric reductase                   | plasma membrane                | YIFre1p / YALI0D26081g       |
| Ftr1p                        | iron permease                      | plasma membrane                | YIFtr1p / YALI0D07304g       |
| Smf1p                        | divalent metal ion transporter     | plasma membrane                | YSmf1p / YALI0c04411g        |
| Arn1p                        | siderophore transport              | plasma membrane                | YIArn1p / YALI0C02541g       |
| Ccc1p                        | iron transporter                   | vacuolar membrane              | YICcc1p / YALI0D20306g       |
| Rim101p                      | transcription factor               | cytoplasmic/nuclear            | YIRim101p / YALI0B13640g     |
| Rim21p                       | pH sensor                          | plasma membrane                | YIRim21p / YALI0F12397g      |
| Ras2p                        | GTPase                             | plasma membrane                | YIRas2p / YALI1E35305p       |
| Vma1p                        | proton pump subunit A              | vacuolar membrane              | YIVma1p / YALI0A09900p       |
| Vma2p                        | proton pump subunit B              | vacuolar membrane              | YIVma2p / YALI0E27346g       |
| Fks1p                        | 1,3-beta-glucan synthase           | cell wall                      | YALI0E21021g                 |
| Gas1p                        | 1,3-beta-glucanosyltransferase     | cell wall<br>nuclear periphery | YIPhr2p / YALI0D06039g       |
